# Supplementary material for: BB0323 and Novel Virulence Determinant BB0238:Borrelia burgdorferiProteins That Interact With and Stabilize Each Other and Are Critical for Infectivity
Source: Oxford University Press journal article supplement (doi:10.1093/infdis/jiu460), 2014-08-19
Supplement: jiu460_Supplementary_Data.zip [file jiu460_Supplementary_Data.zip]

Archive with 3 entries (3 files):
- jiu460supp_fig1.pdf
- jiu460supp.docx
- jiu460supp_table1.pdf
