# Supplementary material for: BB0323 and Novel Virulence Determinant BB0238:Borrelia burgdorferiProteins That Interact With and Stabilize Each Other and Are Critical for Infectivity
Source: Oxford University Press journal article supplement (doi:10.1093/infdis/jiu460), 2014-08-19
Supplement: jiu460_Supplementary_Data.zip [file jiu460_Supplementary_Data.zip › jiu460supp.docx]

**Legends to Supplementary Figures**

**Figure S1.** *In vivo* interaction of BB0238 and BB0323. (**A**) Interaction between BB0238 and BB0323 is evidenced in a yeast two-hybrid assay. Y2Hgold (MATa) yeast colonies expressing specific recombinant proteins, including BB0238 or BB0323, which grew on selective media due to reporter gene activation resulting from protein-protein interaction, were further spread on nutrient-deficient agar plates and assayed for *lacZ* expression with an X-alpha-galactosidase filter assay, as described in the text. Known interactions between T antigen and p53 or with BB0323 and BB0238 served as positive and negative controls respectively. Production of blue color by the positive control or by BB0323-BB0238 interactive clones is shown. (**B**) BB0323 antibodies co-immunoprecipitated BB0238 from wild-type *B. burgdorferi* lysates. *B. burgdorferi* lysates from wild type (WT) and *bb0323* mutants lacking a C-terminal fragment *(bb0323*ΔC) were incubated with anti-BB0323 and Protein G beads. Note that as *bb0323* deletion mutants are difficult to grow, *bb0323*ΔC isolates, which display growth kinetics similar to WT, are used. Bound proteins were resolved by two-dimensional gel electrophoresis. A 27 kDa protein spot was excised from the gel with WT lysate (arrow), and protein identification was performed by LC/MS-MS. Migration of protein standards is shown to the left in kilodaltons.
