# Supplementary material for: BB0323 and Novel Virulence Determinant BB0238:Borrelia burgdorferiProteins That Interact With and Stabilize Each Other and Are Critical for Infectivity
Source: Oxford University Press journal article supplement (doi:10.1093/infdis/jiu460), 2014-08-19
Supplement: jiu460_Supplementary_Data.zip [file jiu460_Supplementary_Data.zip › jiu460supp_table1.pdf]

**Supplementary Table S1.** Oligonucleotide primers used in the current study.

| Sequence (5'→ 3')               | Purpose                                                                                                                                                |
|---------------------------------|--------------------------------------------------------------------------------------------------------------------------------------------------------|
| CCCAAGGTTGTTATGCTTGA            | Primer P9, forward primer for Quantitative PCR of <i>bb0238</i>                                                                                        |
| ATCAGCATCGGCCTTAGATG            | Primer P10, reverse primer for Quantitative PCR of <i>bb0238</i>                                                                                       |
| TTGCTGATCAAGCTCAATATAACCA       | Forward primer for Quantitative PCR of <i>B. burgdorferi flaB</i>                                                                                      |
| TTGAGACCCTGAAAGTGATGC           | Reverse primer for Quantitative PCR of <i>B. burgdorferi flaB</i>                                                                                      |
| AGAGGGAAATCGTGCGTGAC            | Forward primer for Quantitative PCR of mouse <i>β-actin</i>                                                                                            |
| CAATAGTGATGACCTGGCCGT           | Reverse primer for Quantitative PCR of mouse <i>β-actin</i>                                                                                            |
| GGTATCGTGCTCGACTC               | Forward primer for Quantitative PCR of tick <i>β-actin</i>                                                                                             |
| ATCAGGTAGTCGGTCAGG              | Reverse primer for Quantitative PCR of tick <i>β-actin</i>                                                                                             |
| AATGCGGCCGCATTCAGCTTAACACTGATCC | Primer P1, 5' PCR of the left arm for constructing <i>bb0238</i> mutant. A NotI site (italicized) is attached for the purpose of cloning.              |
| AATGGATCCAGTCTTTAAAAATTTCAAAA   | Primer P2, 3' PCR of the left arm for constructing <i>bb0238</i> mutant. A BamHI site (italicized) is attached for the purpose of cloning.             |
| AATCTCGAGCTATAAATAATTATAATACA   | Primer P3, 5' PCR of the right arm for constructing <i>bb0238</i> mutant. A XhoI site (italicized) is attached for the purpose of cloning.             |
| AATGGTACCTTACACCCAATCCCCATCCA   | Primer P4, 3' PCR of the right arm for constructing <i>bb0238</i> mutant. A KpnI site (italicized) is attached for the purpose of cloning.             |
| TCCAACATTGCTAATAACAG            | Primer P5, 5' PCR primer for the detection of intended integration of the <i>pflaB-Kan</i> cassette in the <i>bb0238</i> locus                         |
| CGCTCATTCTTGCTGCTGTG            | Primer P6, 3' PCR primer for the detection of intended integration of the <i>pflaB-Kan</i> cassette in the <i>bb0238</i> locus                         |
| CAGGAATTAAGTCAACCATCAA          | Forward primer for PCR of <i>bb0237</i>                                                                                                                |
| CAGAGGATGATAATAATTGGTTTT        | Reverse primer for PCR of <i>bb0237</i>                                                                                                                |
| GGCATTTCAGTCCAAATTA             | Forward primer for PCR of <i>bb0239</i>                                                                                                                |
| TAATTCTGCGCTCAACTTCA            | Reverse primer for PCR of <i>bb0239</i>                                                                                                                |
| GGTTGCATTGATTCTCTGT             | Primer P7, Kanamycin internal forward primer                                                                                                           |
| ATTCCGACTCGTCCAACATC            | Primer P8, Kanamycin internal forward primer                                                                                                           |
| ATTCTCGAGTCAATTTATGGAAGACAAAA   | Primer P12, 5' PCR primer of the right arm for <i>bb0238</i> complementation. An XhoI site (italicized) is attached for cloning.                       |
| CCGCTCGAGCGAGCTTCAAGGAAGA       | Primer P13, forward primer for amplification of <i>PflgB-aadA</i> cassette in pKFSS1. A XhoI site (italicized) is attached for the purpose of cloning. |
| ACGCGTCGACATTATTTGCCGACTACC     | Primer P9, reverse primer for amplification of <i>PflgB-aadA</i> cassette in pKFSS1. A SalI site (italicized) is attached for the purpose of cloning.  |
| CGGAATTCAAACGCCTCCAGAATCAAGA    | Forward primer for cloning of <i>bb0323</i> in pGBKT7. An EcoRI site (italicized) is attached for the purpose of cloning.                              |
| AACTGCAGTTATTTGGCAGGAATTATTAT   | Reverse primer for cloning of <i>bb0323</i> in pGBKT7. A PstI site (italicized) is attached for the purpose of cloning.                                |
| AATGAATTCCAAGGTAGTTCTTCTTATAT   | Forward primer for cloning of <i>bb0238</i> in pGADT7 plasmid. An EcoRI site (italicized) is attached for the purpose of cloning.                      |

|                                        |                                                                                                                                                                                                    |
|----------------------------------------|----------------------------------------------------------------------------------------------------------------------------------------------------------------------------------------------------|
| CCGCTCGAGTCAATTTATGGAAGACAAAAACCA      | Reverse primer for cloning of <i>bb0238</i> in pGADT7 plasmid, and production of recombinant BB0238 in <i>E. coli</i> . An XhoI site ( <i>italicized</i> ) is attached for the purpose of cloning. |
| CGGGATCCCAAGGTAGTTCTTCTTATATTGATAAGCAA | Forward primer for recombinant BB0238 production in <i>E. coli</i> . A BamHI site ( <i>italicized</i> ) is attached for cloning.                                                                   |
