# Supplementary figures and images for: BB0323 and Novel Virulence Determinant BB0238:Borrelia burgdorferiProteins That Interact With and Stabilize Each Other and Are Critical for Infectivity
Source: Oxford University Press journal article supplement (doi:10.1093/infdis/jiu460), 2014-08-19

Figure S1

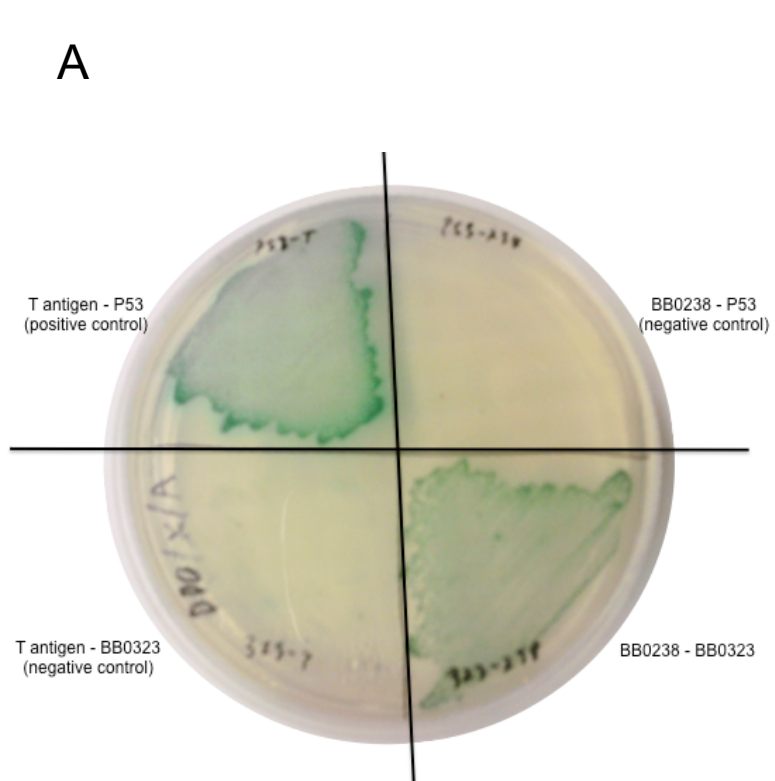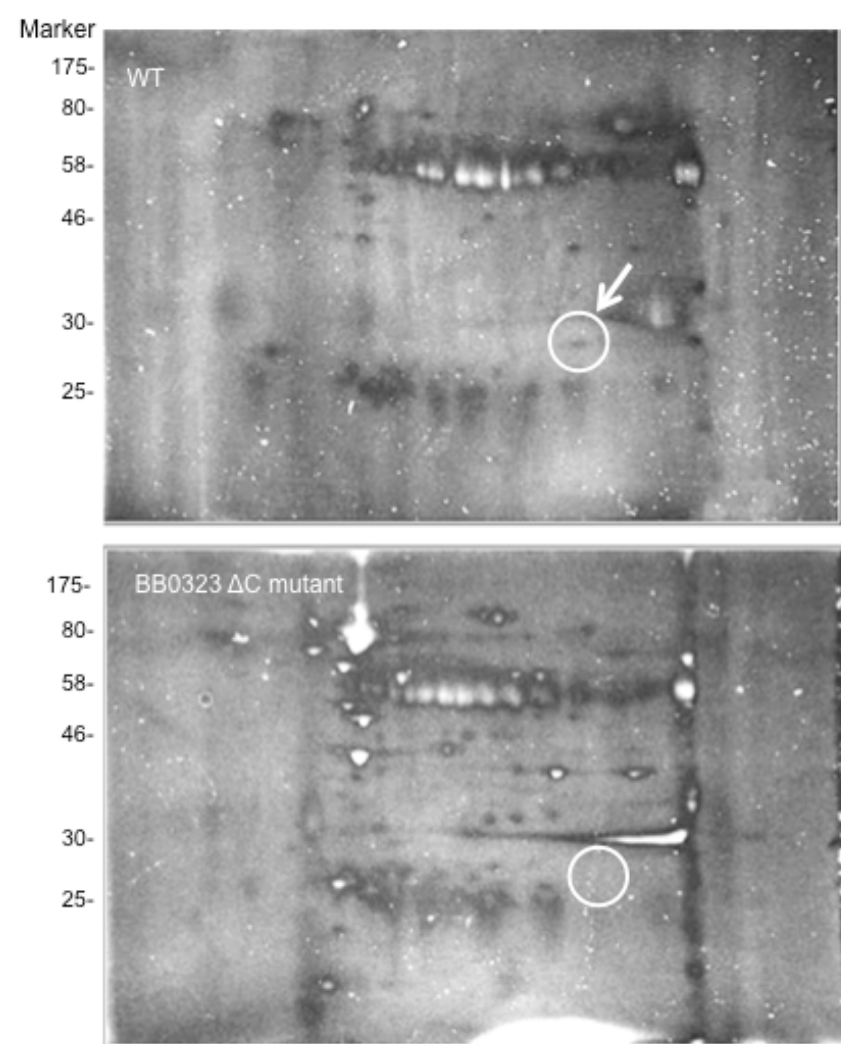

Supplement: jiu460_Supplementary_Data.zip [file jiu460_Supplementary_Data.zip › jiu460supp_fig1.pdf]
